# Supplementary material for: Protein Intake by Source and Breast Cancer Incidence and Mortality: The Women’s Health Initiative
Source: PubMed Central journal article supplement — JNCI Cancer Spectr. 2020 Nov 7;4(6):pkaa101. doi: 10.1093/jncics/pkaa101 (PMC7768926; doi:10.1093/jncics/pkaa101), 2020-11-07
Supplement: pkaa101_supplementary_data.pdf [file pkaa101_supplementary_data.pdf]

## SUPPLEMENTARY MATERIALS

Supplementary Table 1. Protein intake of WHI dietary modification trial comparison participants at trial years 1, 4, and 7 (n=1858)

|                   | <b>Protein Intake (g/dy)</b> | <b>Protein Difference From Year 1</b> |
|-------------------|------------------------------|---------------------------------------|
| <b>Time Point</b> | <b>Mean (SD)</b>             | <b>Mean (SD)</b>                      |
| Year 1            | 68.3 (27.4)                  | 0                                     |
| Year 4            | 68.0 (27.1)                  | -0.3 (24.9)                           |
| Year 7            | 67.6 (27.7)                  | -0.8 (27.0)                           |
